# Supplementary material for: Lipase-mediated Baeyer–Villiger oxidation of benzylcyclopentanones in ester solvents and deep eutectic solvents
Source: PubMed Central journal article supplement (PMC9427991; doi:10.1038/s41598-022-18913-2), 2022-08-30
Supplement: 41598_2022_18913_MOESM1_ESM.pdf [file 41598_2022_18913_MOESM1_ESM.pdf]

# ***Scientific Reports***

## **Supplementary Materials**

### **Lipase-mediated Baeyer-Villiger oxidation of benzylcyclopentanones in esters solvents and deep eutectic solvents**

Marcelina Mazur<sup>1,\*</sup>, Tomasz Janeczko<sup>1</sup>, Witold Gładkowski<sup>1</sup>

<sup>1</sup>Department of Food Chemistry and Biocatalysis, Wrocław University of Environmental and Life Sciences, Norwida 25, 50-375 Wrocław, Poland

\*Correspondence: Dr. Marcelina Mazur [marcelina.mazur@upwr.edu.pl](mailto:marcelina.mazur@upwr.edu.pl); Tel/Fax.: +48-713205197

**Number of pages: 11**

**8 Figures, 2 Table**

**List of Supplementary Materials.**

**Figure S1.**  $^1\text{H}$ -NMR and  $^{13}\text{C}$ -NMR spectrum of ketone 1.

**Figure S2.**  $^1\text{H}$ -NMR and  $^{13}\text{C}$ -NMR spectrum of lactone 2.

**Figure S3.**  $^1\text{H}$ -NMR and  $^{13}\text{C}$ -NMR spectrum of ketone 3.

**Figure S4.**  $^1\text{H}$ -NMR and  $^{13}\text{C}$ -NMR spectrum of lactone 4.

**Figure S5.**  $^1\text{H}$ -NMR and  $^{13}\text{C}$ -NMR spectrum of ketone 5.

**Figure S6.**  $^1\text{H}$ -NMR and  $^{13}\text{C}$ -NMR spectrum of lactone 6.

**Figure S7.** The DESs after 3 days at 25 and 55°C.

**Figure S8.** The DESs after 6 days at 25 and 55°C.

**Table S1.** Comparison of literature data showing BV-type oxidation of cyclic ketones.

**Table S2.** The list of chemicals used in the experiments.

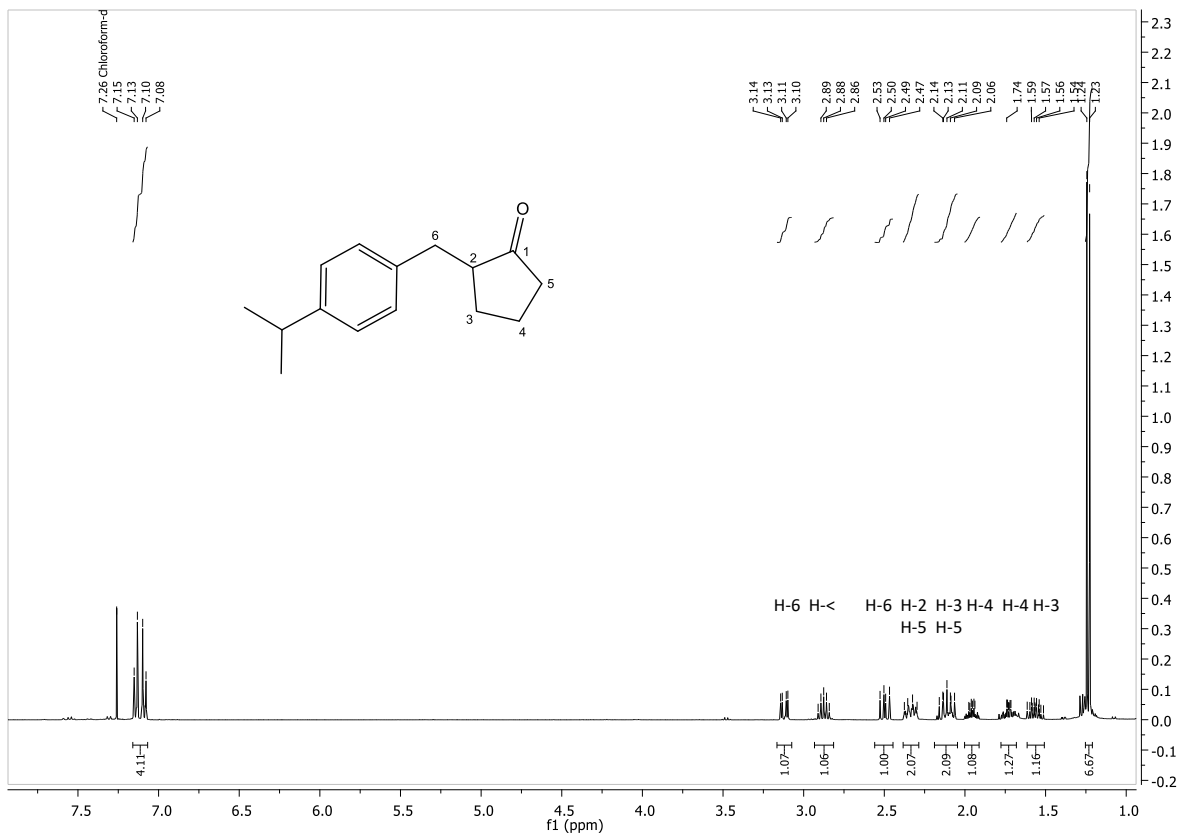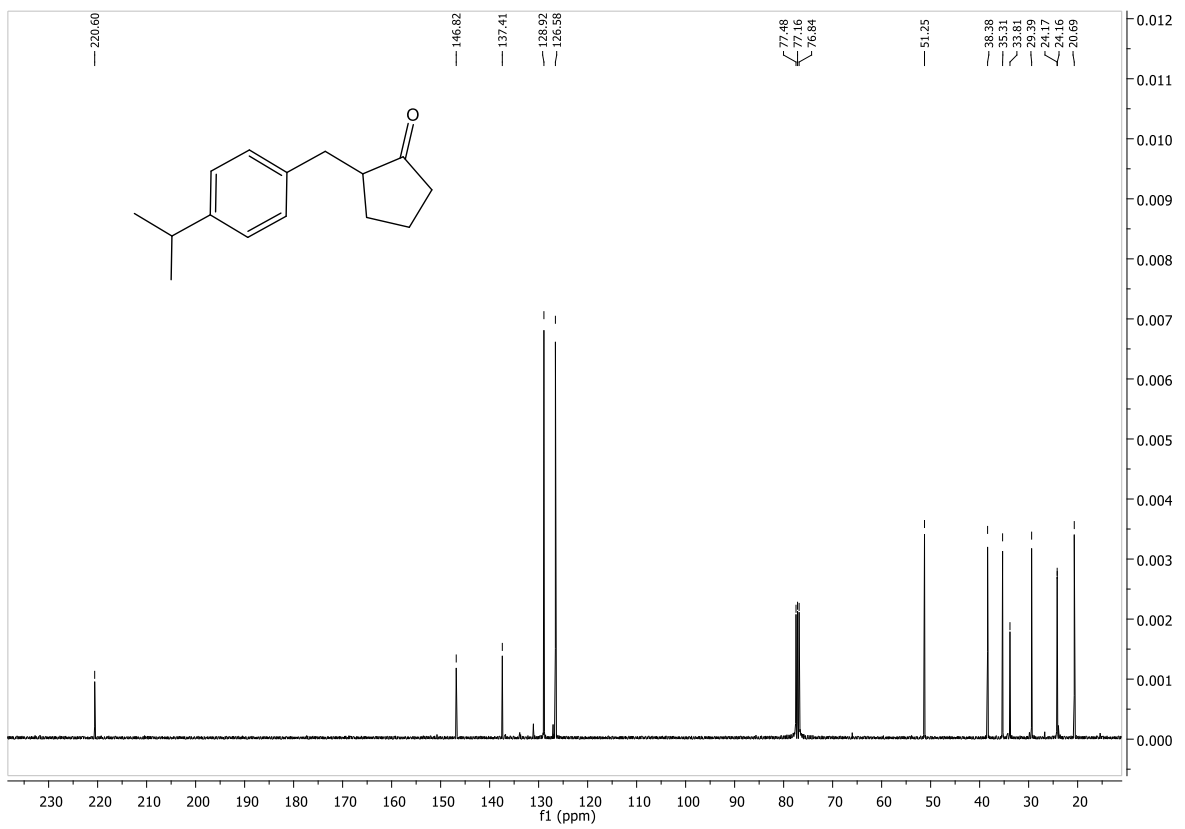

Figure S1: <sup>1</sup>H-NMR and <sup>13</sup>C-NMR spectrum of ketone 1.

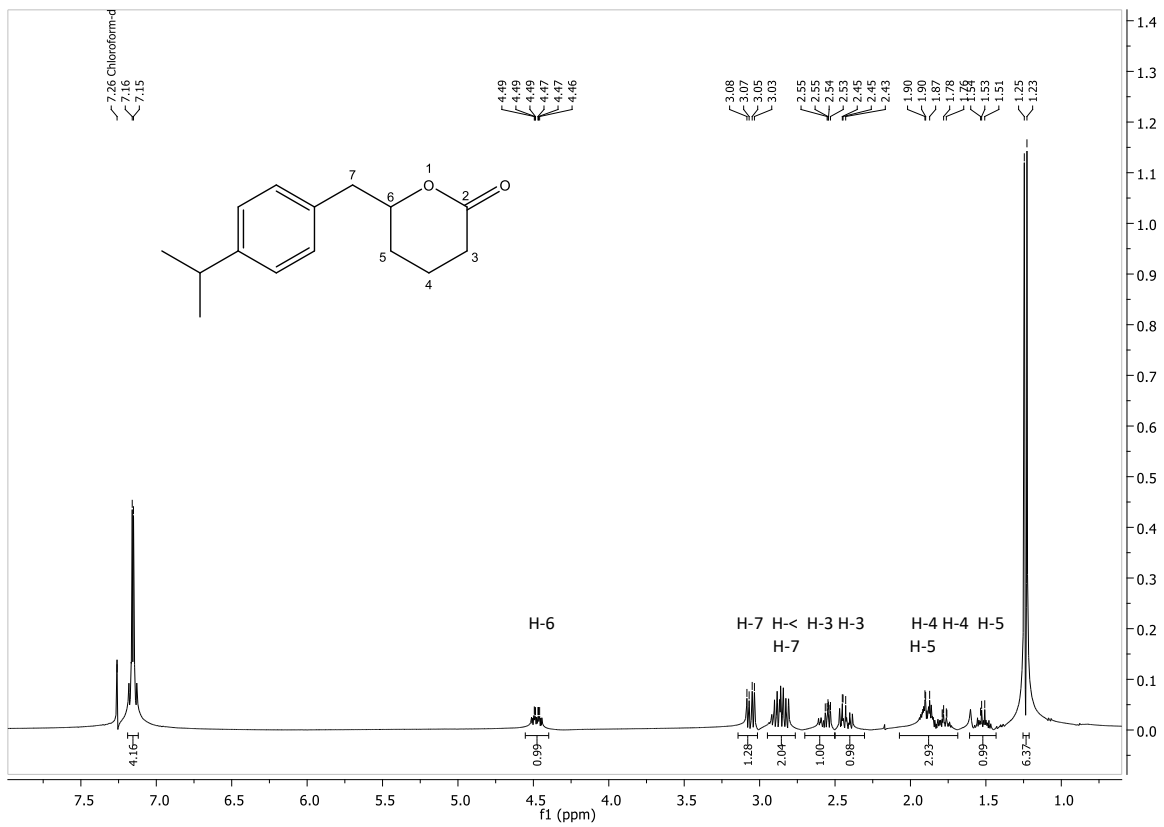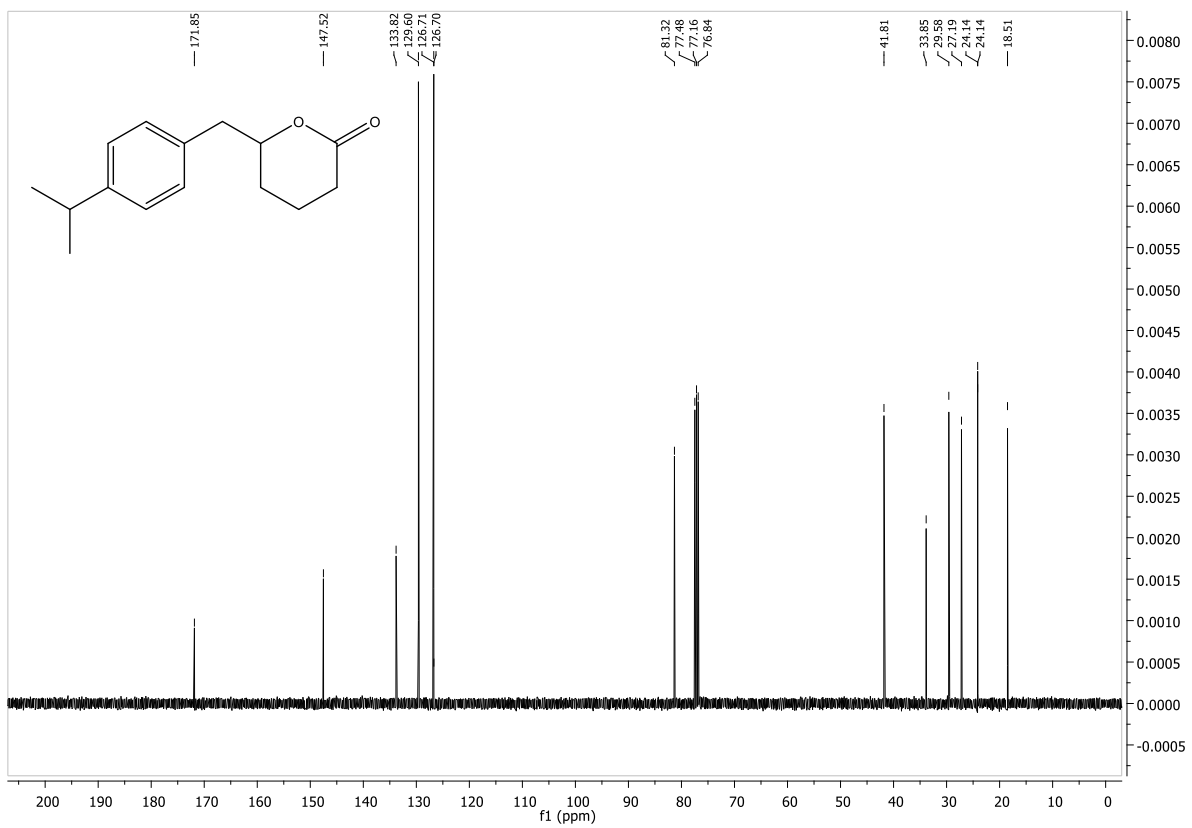

Figure S2: <sup>1</sup>H-NMR and <sup>13</sup>C-NMR spectrum of lactone 2.

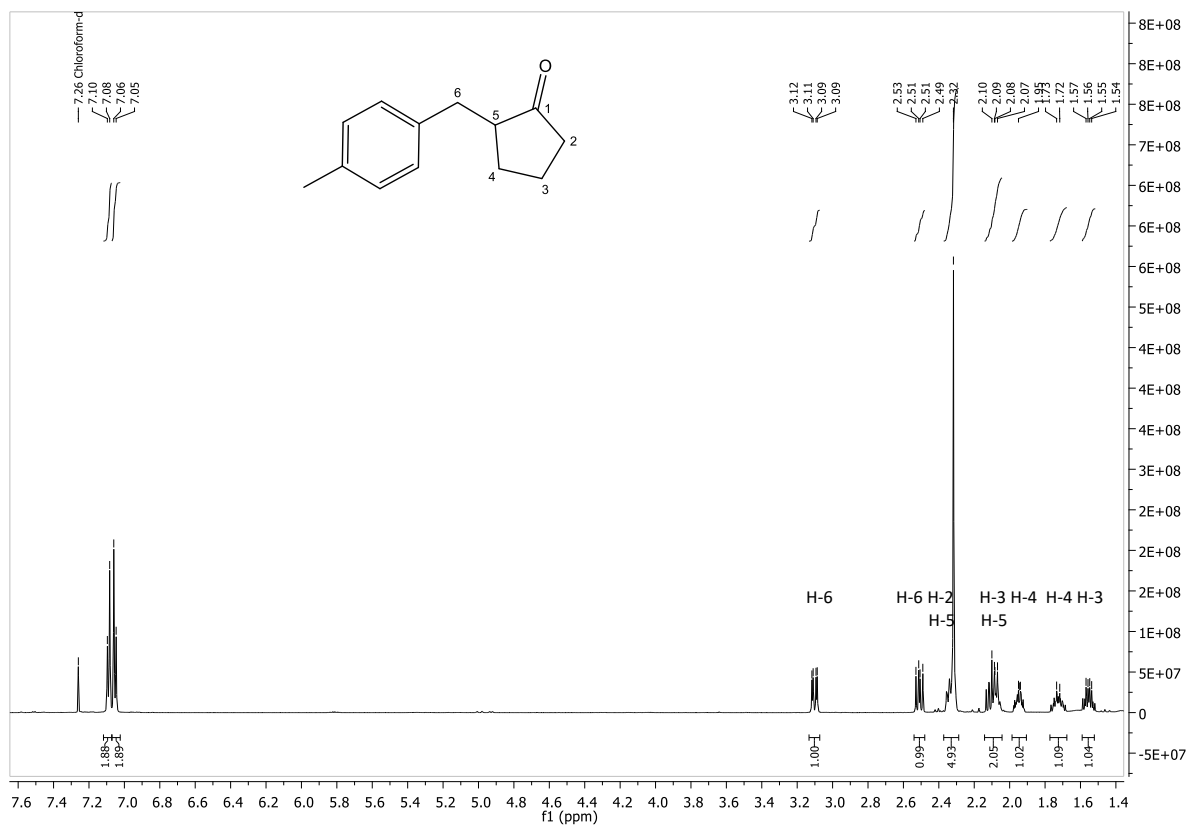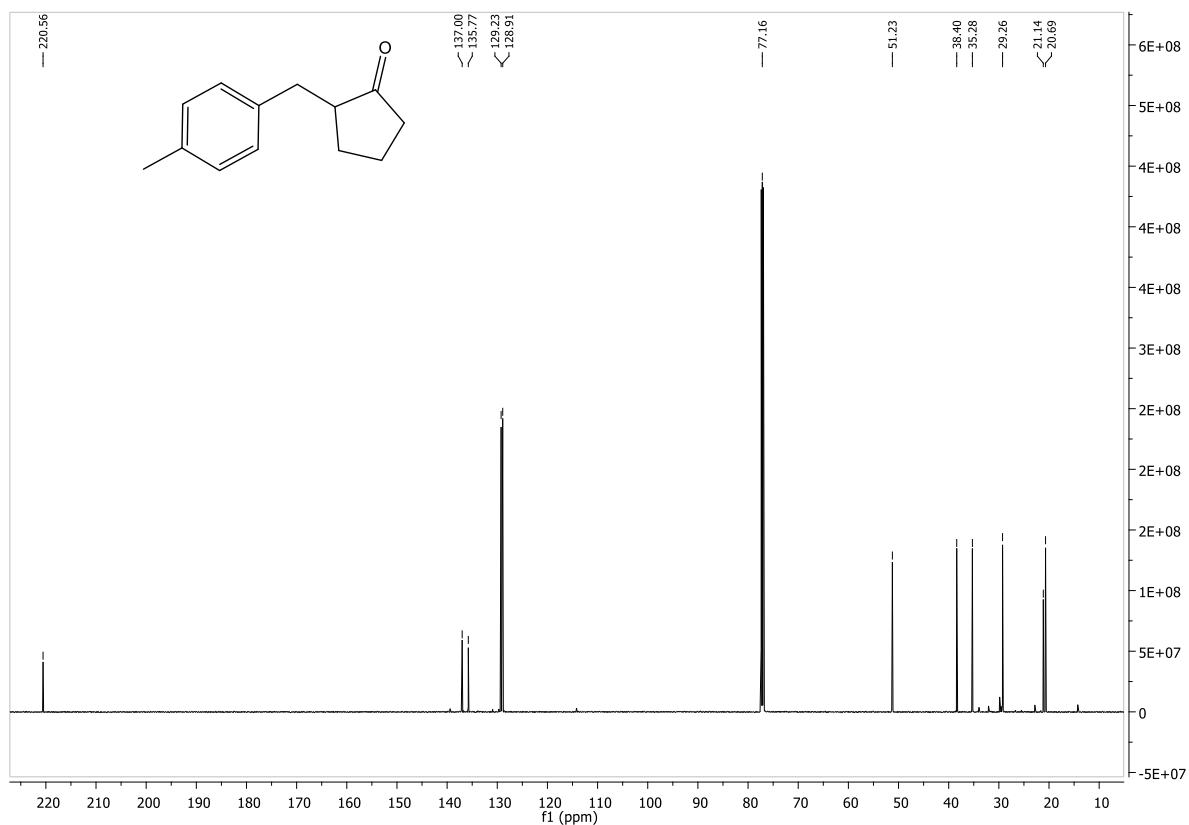

Figure S3: <sup>1</sup>H-NMR and <sup>13</sup>C-NMR spectrum of ketone 3.

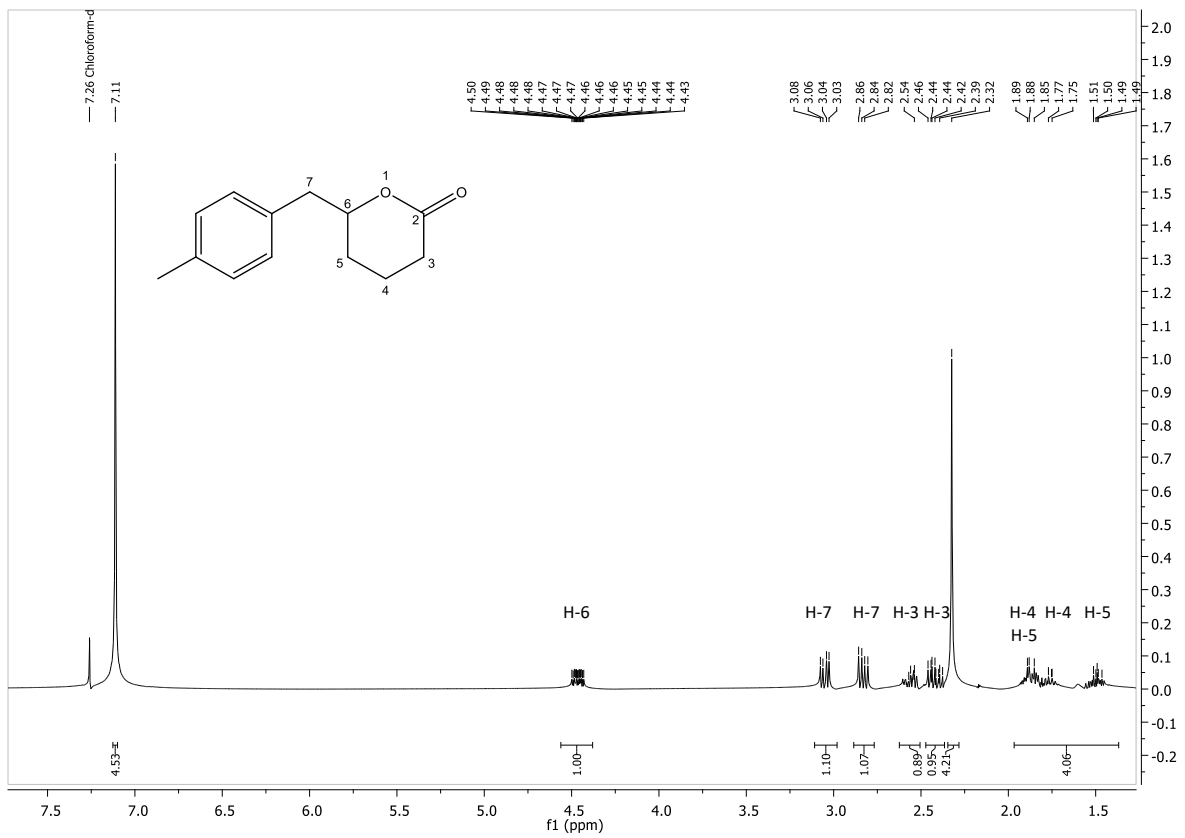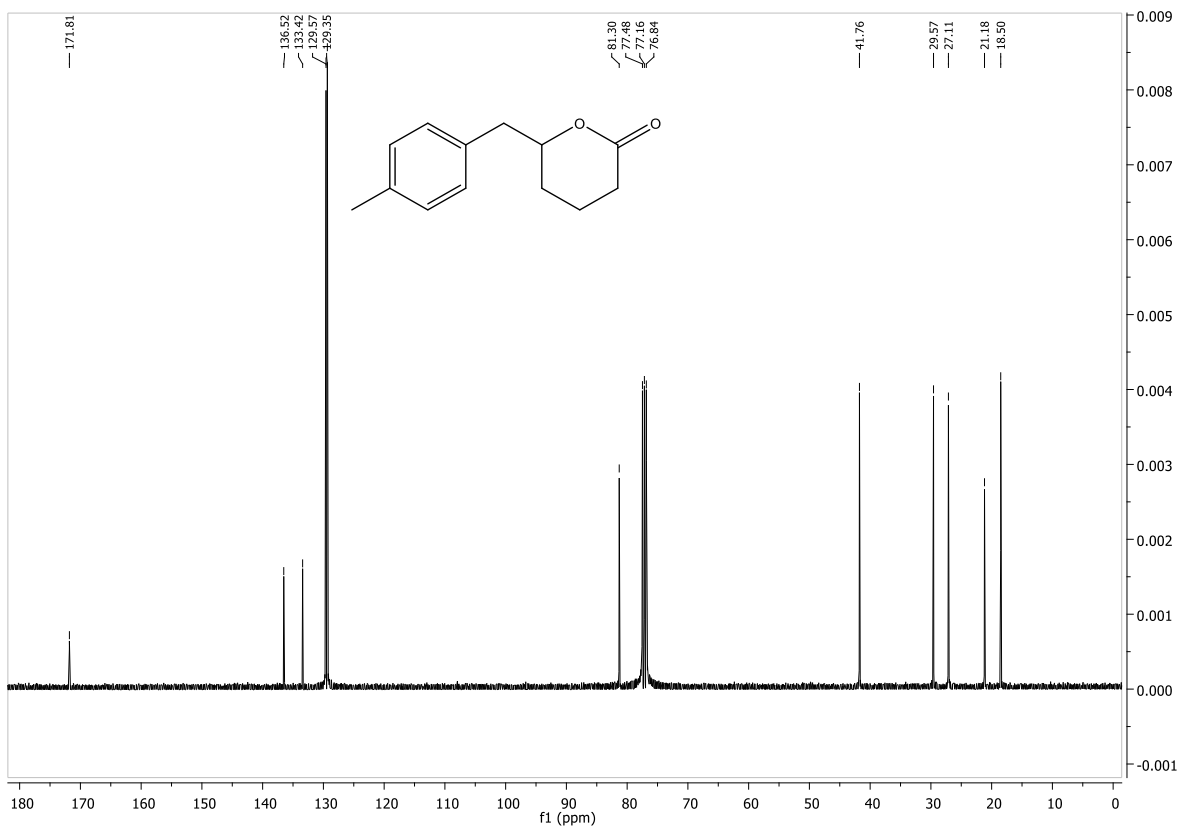

Figure S4: <sup>1</sup>H-NMR and <sup>13</sup>C-NMR spectrum of lactone 4.

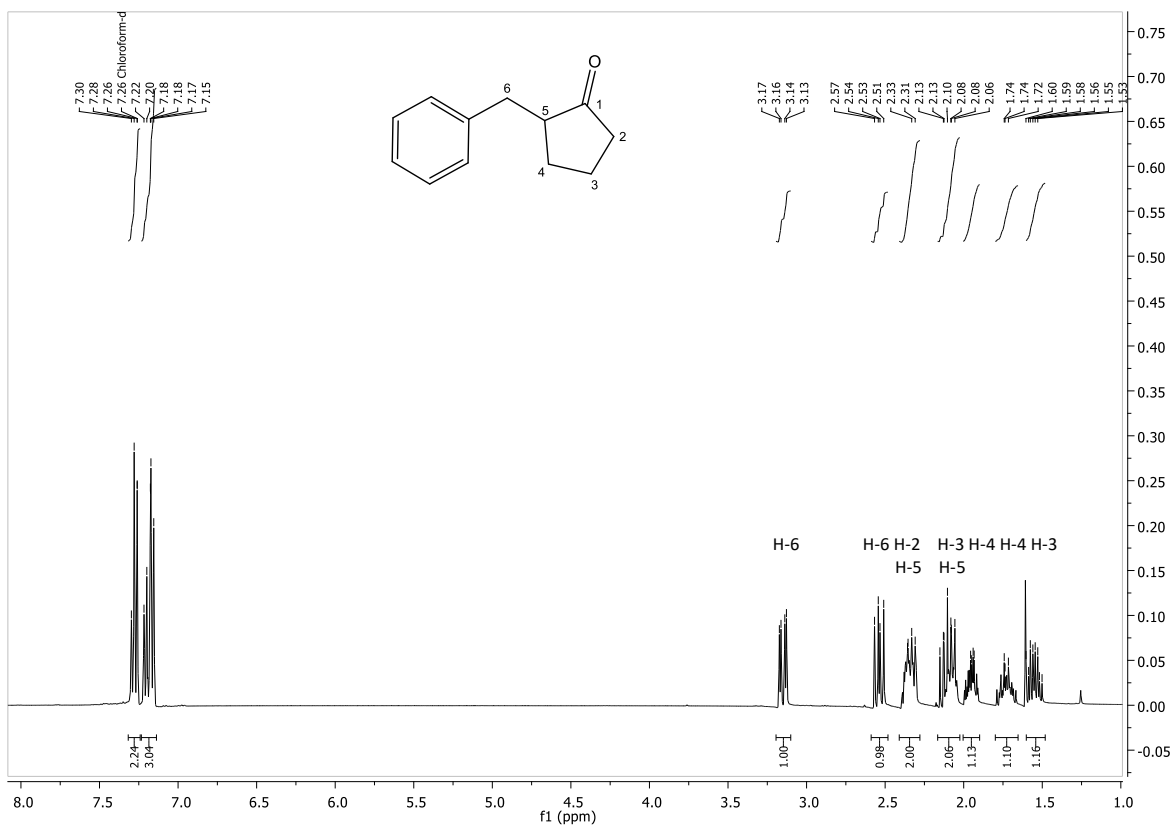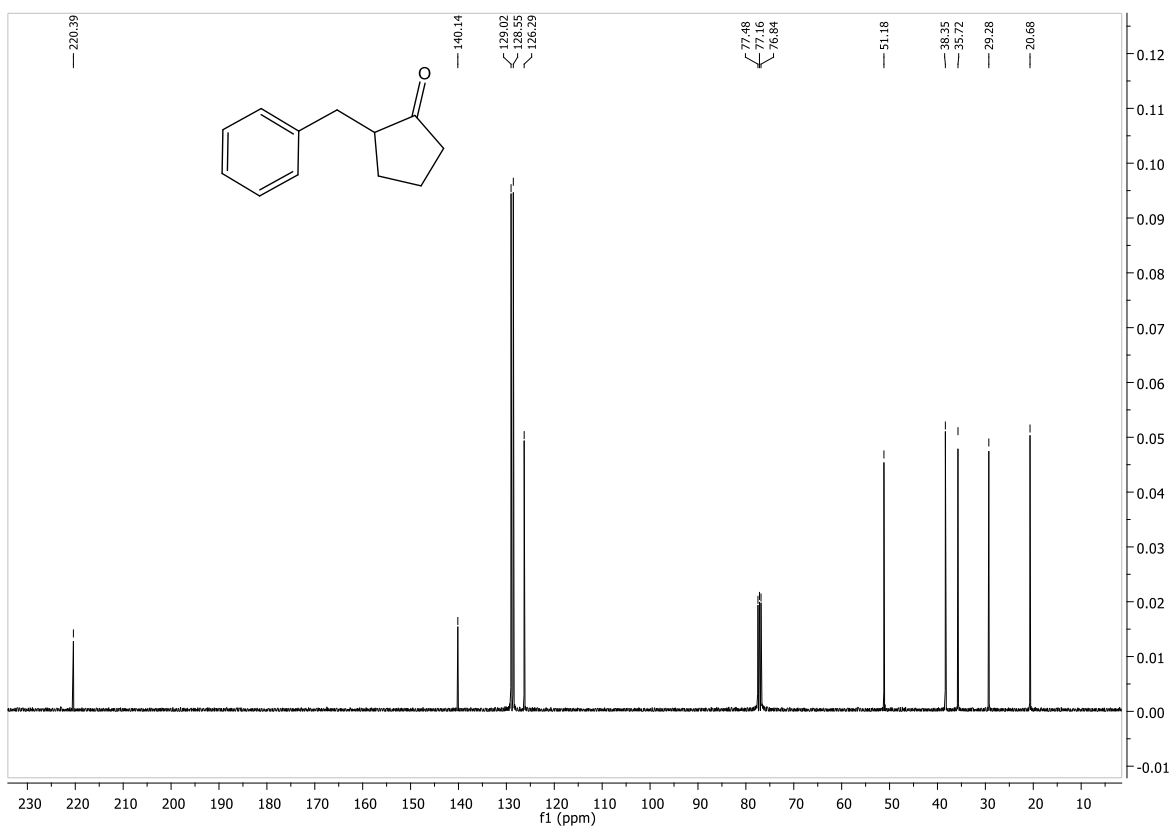

Figure S5: <sup>1</sup>H-NMR and <sup>13</sup>C-NMR spectrum of ketone 5.

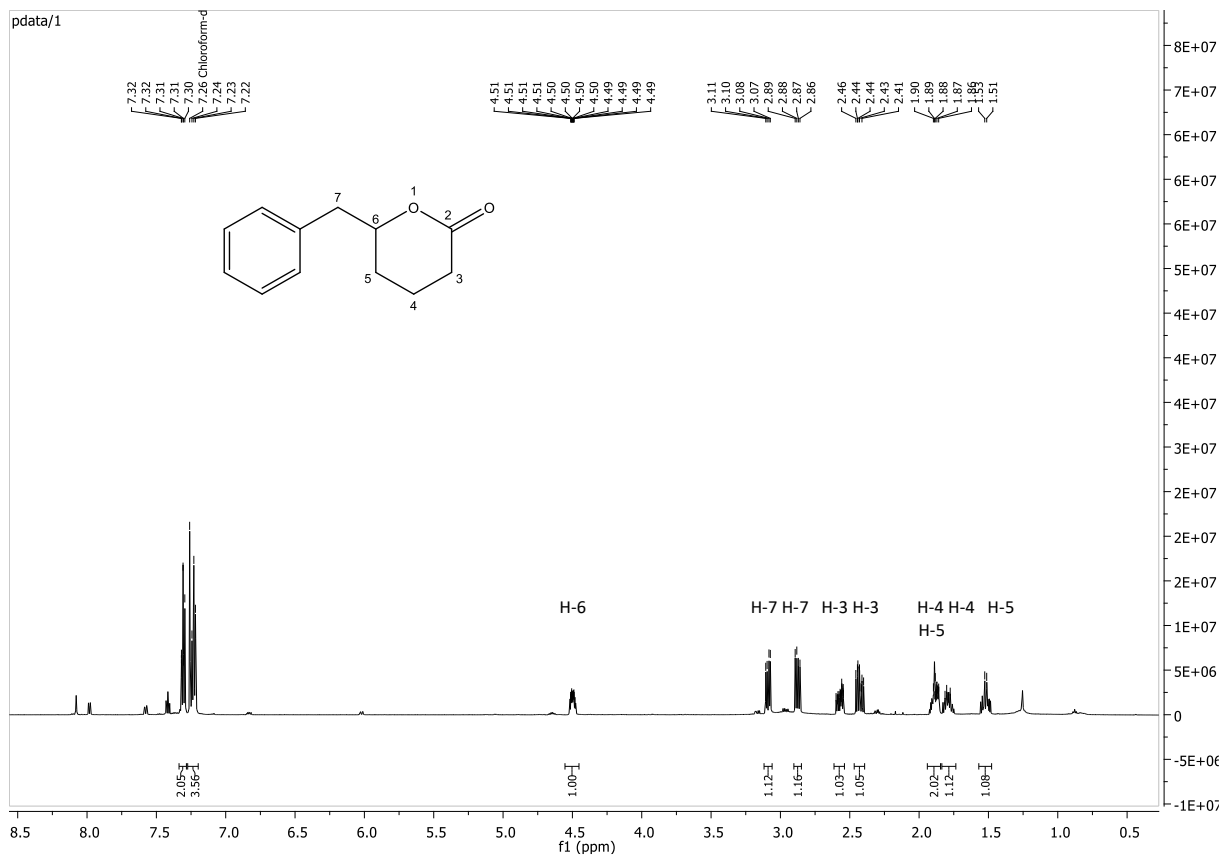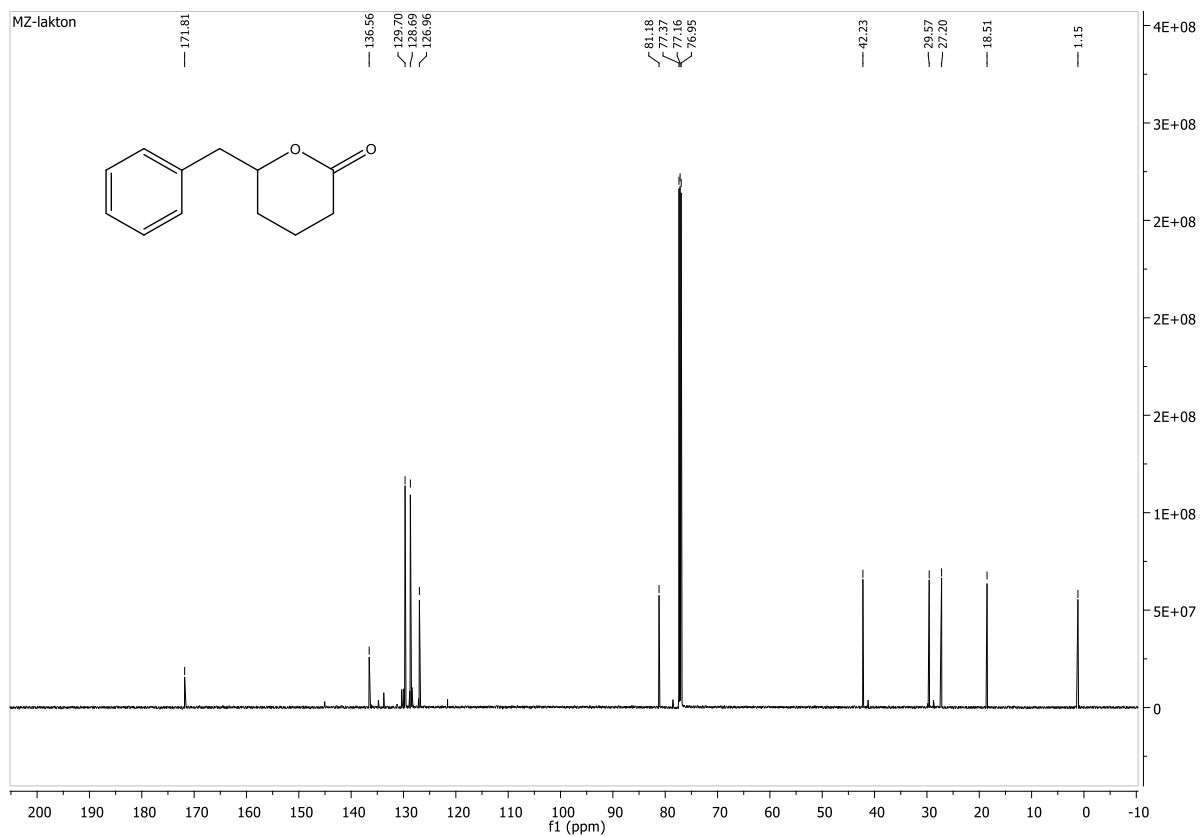

Figure S6:  $^1\text{H}$ -NMR and  $^{13}\text{C}$ -NMR spectrum of lactone 6.



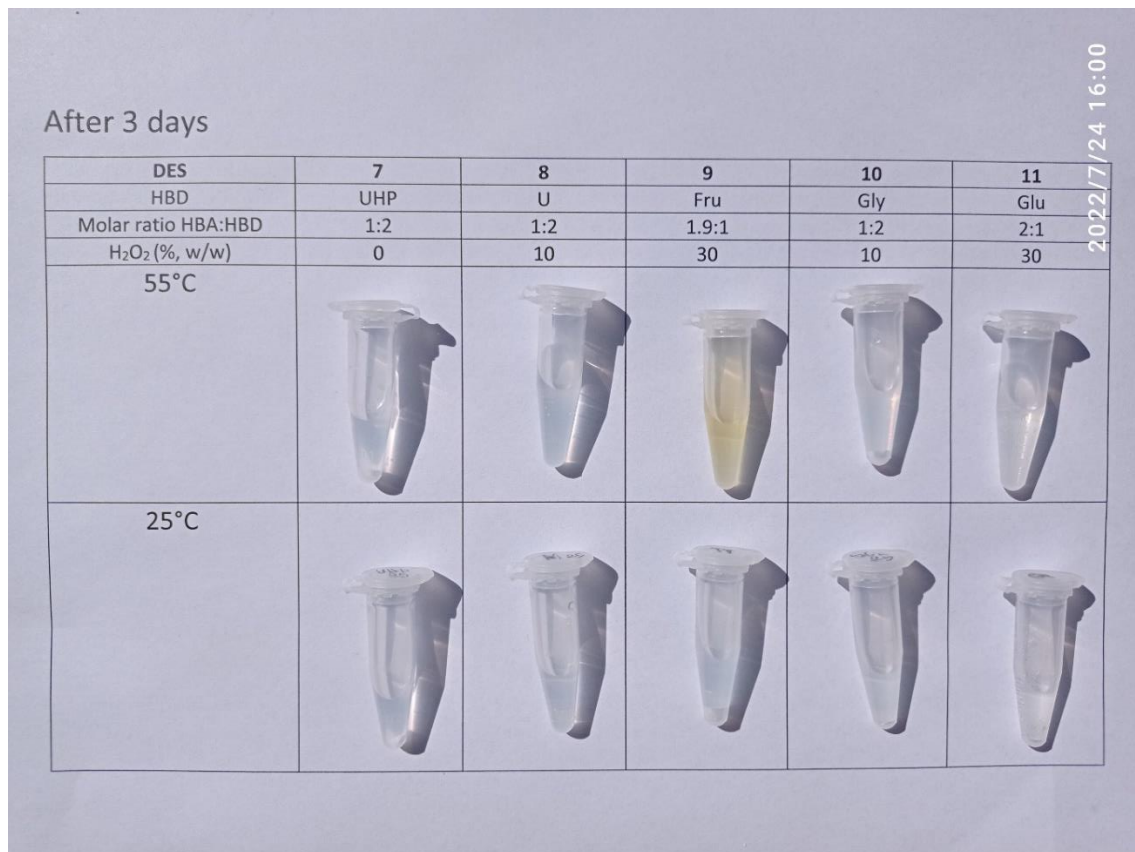

**Figure S7.** The DESs after 3 days at 25 and 55°C.

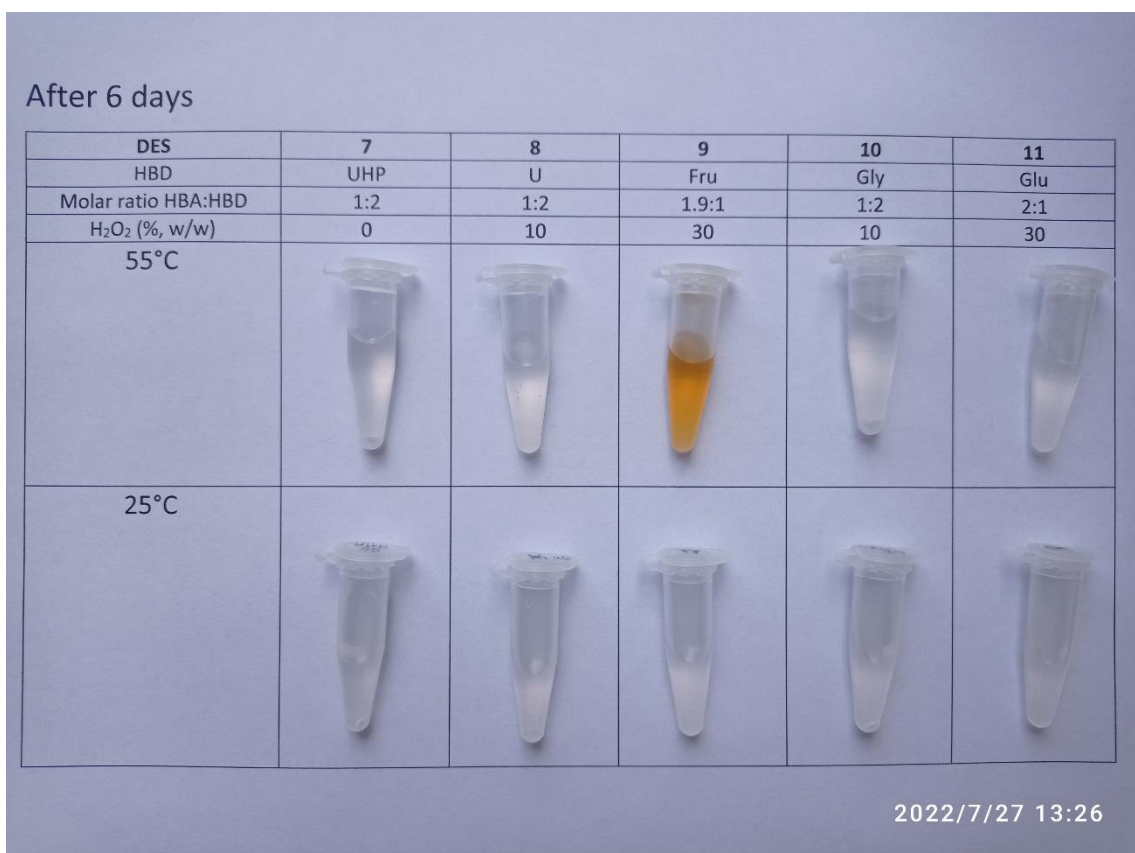

**Figure S8.** The DESs after 6 days at 25 and 55°C.

**Table S1.** Comparison of literature data showing BV-type oxidation of cyclic ketones

| Entry | Substrate                                                                         | Product                                                                           | Solvent                                                     | Conversion | Time   | References            |
|-------|-----------------------------------------------------------------------------------|-----------------------------------------------------------------------------------|-------------------------------------------------------------|------------|--------|-----------------------|
| 1     | 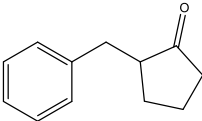 |  | ethyl acetate                                               | 93%        | 5 days | (Ríos et al. 2007)    |
| 2     |  |  |                                                             | 94%        | 3 days |                       |
| 3     |  |  | DES - glucose:<br>fructose:<br>sucrose: water<br>(1:1:1:11) | 74%        | 64 h   | (Vagnoni et al. 2021) |
| 4     |  |  |                                                             | 15%        | 20 h   |                       |
| 5     |  |  | DES - ChCl:<br>sorbitol (1:1)                               | 92%        | 48 h   | (Wang et al. 2017)    |
| 6     |  |  |                                                             | 95%        | 48 h   |                       |

Ríos MY, Salazar E, Olivo HF (2007) Baeyer–Villiger oxidation of substituted cyclohexanones via lipase-mediated perhydrolysis utilizing urea–hydrogen peroxide in ethyl acetate. *Green Chem* 9:459–46. <https://doi.org/10.1039/b618175a>

Vagnoni M, Samori C, Pirini D, et al (2021) Lipase catalysed oxidations in a sugar-derived natural deep eutectic solvent. *Biocatal Biotransformation* 0:1–10. <https://doi.org/10.1080/10242422.2021.1913126>

Wang XP, Zhou PF, Li ZG, et al (2017) Engineering a lipase B from *Candida antactica* with efficient perhydrolysis performance by eliminating its hydrolase activity. *Sci Rep* 7:1–5. <https://doi.org/10.1038/srep44599>

**Table S2.** The list of chemicals used in the experiments

|    | Compound                     | structure                                                           | purity                     | origin         |
|----|------------------------------|---------------------------------------------------------------------|----------------------------|----------------|
| 1  | Octanoic acid                | $\text{CH}_3(\text{CH}_2)_6\text{COOH}$                             | $\geq 99\%$                | Sigma–Aldrich  |
| 2  | urea                         | $\text{CO}(\text{NH}_2)_2$                                          | 98%                        |                |
| 3  | urea hydrogen peroxide (UHP) | $\text{CO}(\text{NH}_2)_2 \cdot \text{H}_2\text{O}_2$               | 97%                        |                |
| 4  | hydrogen peroxide            | $\text{H}_2\text{O}_2$                                              | 30 wt. % solution in water |                |
| 5  | Choline chloride             | $(\text{CH}_3)_3\text{N}(\text{Cl})\text{CH}_2\text{CH}_2\text{OH}$ | 99%                        | Acros organics |
| 6  | Fructose                     | $\text{C}_6\text{H}_{12}\text{O}_6$                                 | 99%                        | Alfa Aesar     |
| 7  | glucose                      | $\text{C}_6\text{H}_{12}\text{O}_6$                                 | Analytical grade           | P.P.H. Stanlab |
| 8  | glycerol                     | $\text{HOCH}_2\text{CH}(\text{OH})\text{CH}_2\text{OH}$             |                            | Chempur        |
| 9  | sodium hydrogen carbonate    | $\text{NaHCO}_3$                                                    |                            | Chempur        |
| 10 | sodium thiosulphate          | $\text{Na}_2\text{S}_2\text{O}_3$                                   |                            | Chempur        |
| 11 | anhydrous magnesium sulphate | $\text{MgSO}_4$                                                     |                            | POCH           |
| 12 | Ethyl acetate                | $\text{CH}_3\text{C}(\text{O})\text{OCH}_2\text{CH}_3$              |                            | P.P.H. Stanlab |
